# Supplementary material for: Numerical Simulation on Ceramic/Metal Armours Impacted by Deformable Projectile
Source: Royal Society of Chemistry journal article supplement (doi:10.1039/c5cp01569c), 2004-01-01
Supplement: c5cp01569c1.pdf [file c5cp01569c1.pdf]

## Supplementary Information

### Transport of photogenerated charges and photoelectric properties in two types of heterostructures with different ZnO microstructures †

Xiangyang Liu,\* Xiuying Cheng, Shun Wang, Kun Zhang and Yuzong Gu\*

*Institute of Microsystems Physics and School of Physics & Electronics, Henan University, Kaifeng 475004, P.R. China*

*E-mail: [lx081276@126.com](mailto:lx081276@126.com)*

#### Supplementary Figures

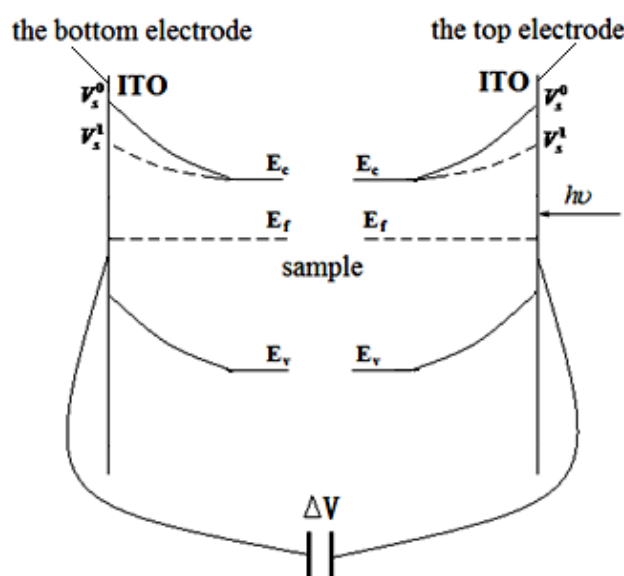

**Fig. S11** The schematic diagram of sandwich structure consisting of ITO (indium tin oxide) and sample in the steady state and electric field induced-surface photovoltage spectroscopy. ( $E_c$ : the bottom of conduction band;  $E_v$ : the top of valence band;  $E_f$ : the Fermi energy level;  $\Delta V$ : the difference of different surface potential;  $V_s^0$ : the surface potential before illumination;  $V_s^1$ : the surface potential after illumination;  $V_s^0, V_s^1 > 0$ ;  $h\nu$ : the incident photon energy).

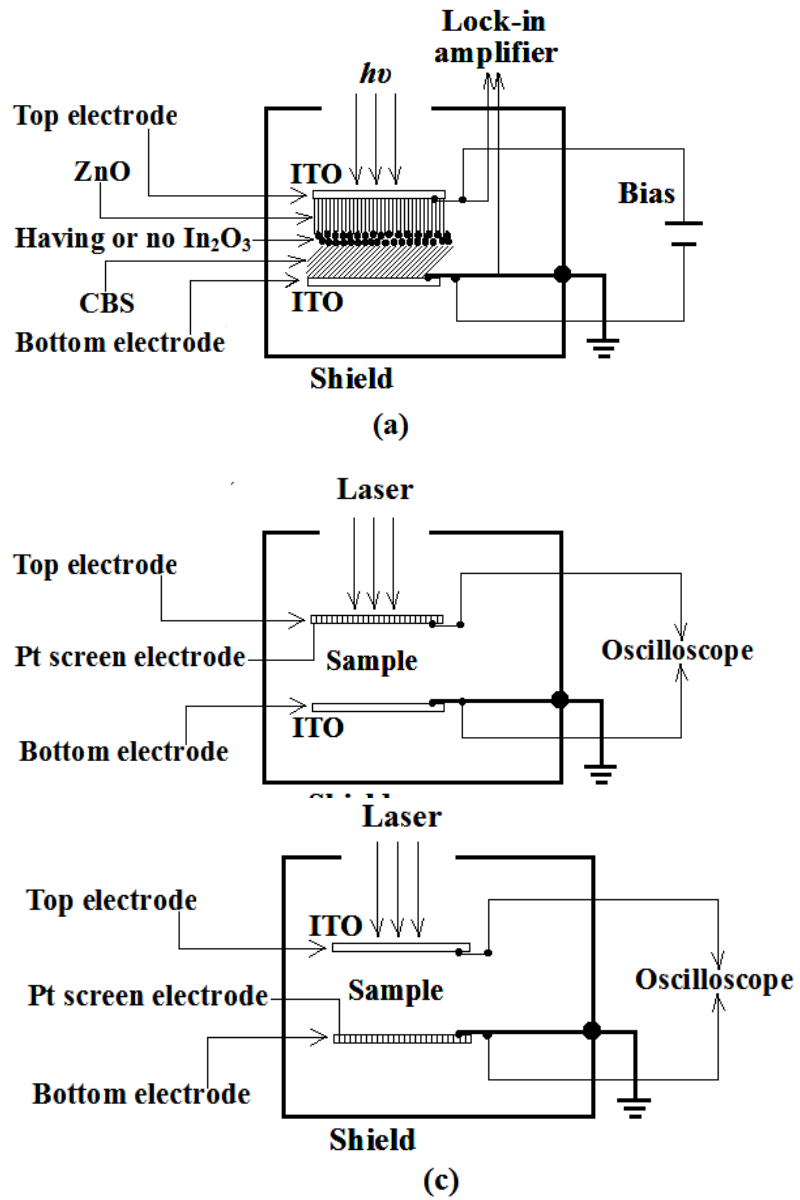

**Fig. S12** The schematic diagrams of sandwich structure for (a) SPS, EFISPS, (b) and (c) TSP measurements with the direction of illumination ( $h\nu$ : the incident photon energy).

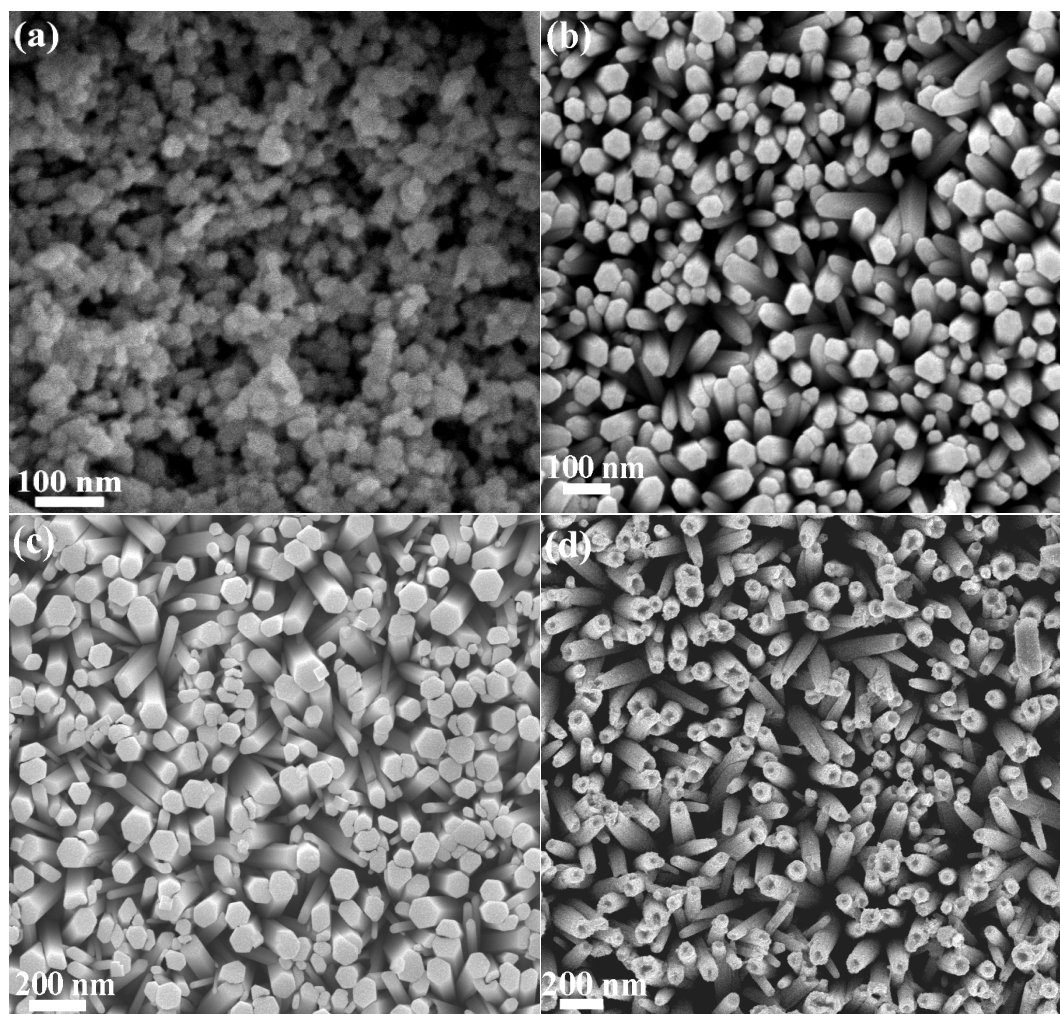

**Fig. SI3** SEM images of ZnO (a) nanoparticles, (b) nanowires arrays, (c) nanorods arrays and (d) nanotubes arrays.

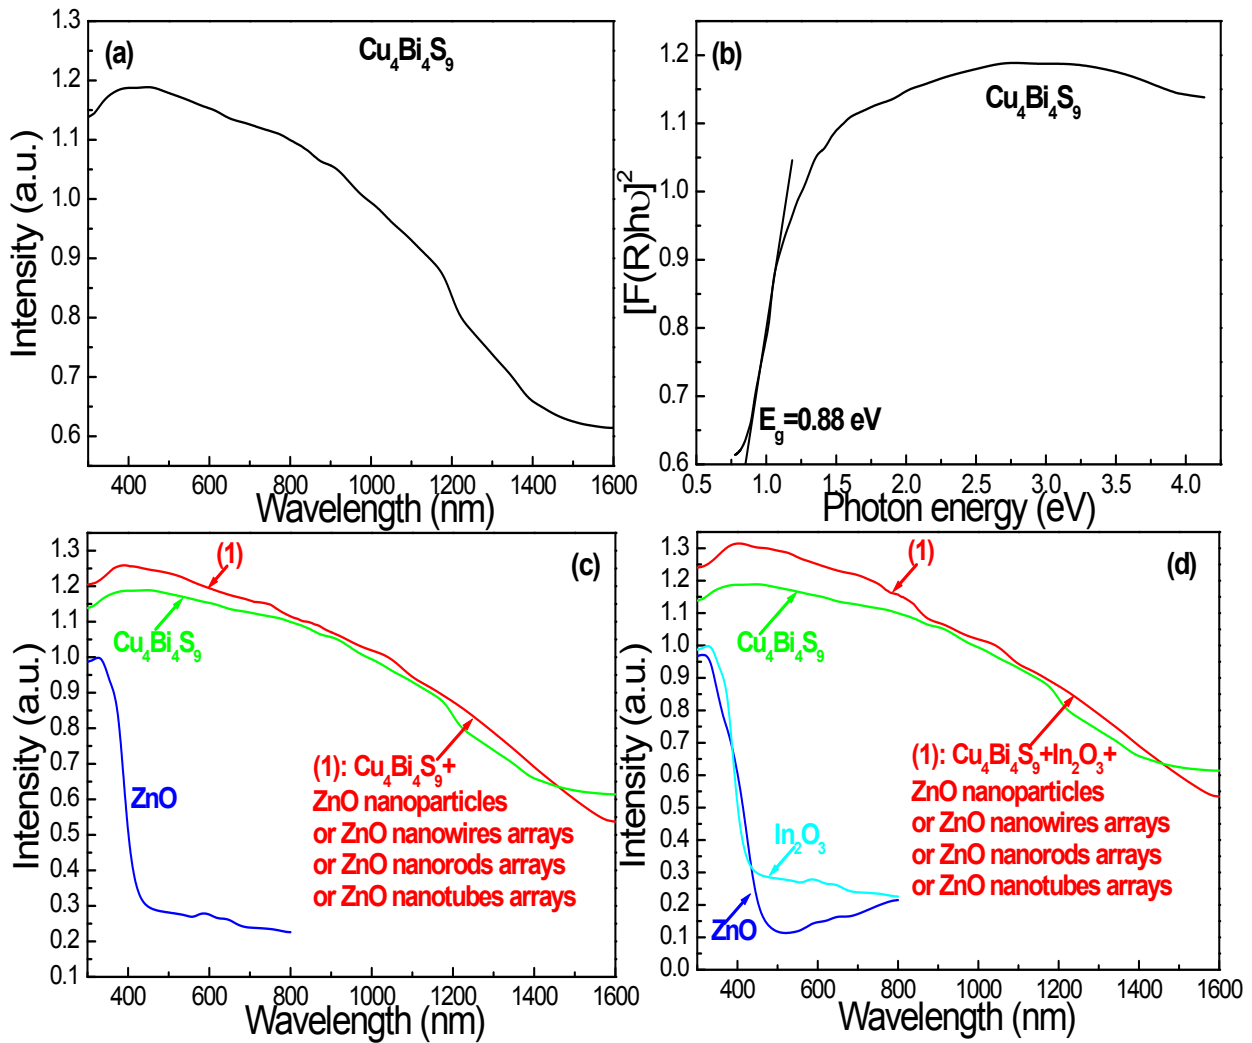

**Fig. S14** UV-Vis spectra of (a)  $\text{Cu}_4\text{Bi}_4\text{S}_9$ , (b)  $\text{Cu}_4\text{Bi}_4\text{S}_9$ , (c)  $\text{Cu}_4\text{Bi}_4\text{S}_9$ , ZnO, ZnO/ $\text{Cu}_4\text{Bi}_4\text{S}_9$  (only showing one nanostructure of ZnO), (d)  $\text{Cu}_4\text{Bi}_4\text{S}_9$ ,  $\text{In}_2\text{O}_3$ , ZnO, ZnO/ $\text{In}_2\text{O}_3$ / $\text{Cu}_4\text{Bi}_4\text{S}_9$  (only showing one nanostructure of ZnO).

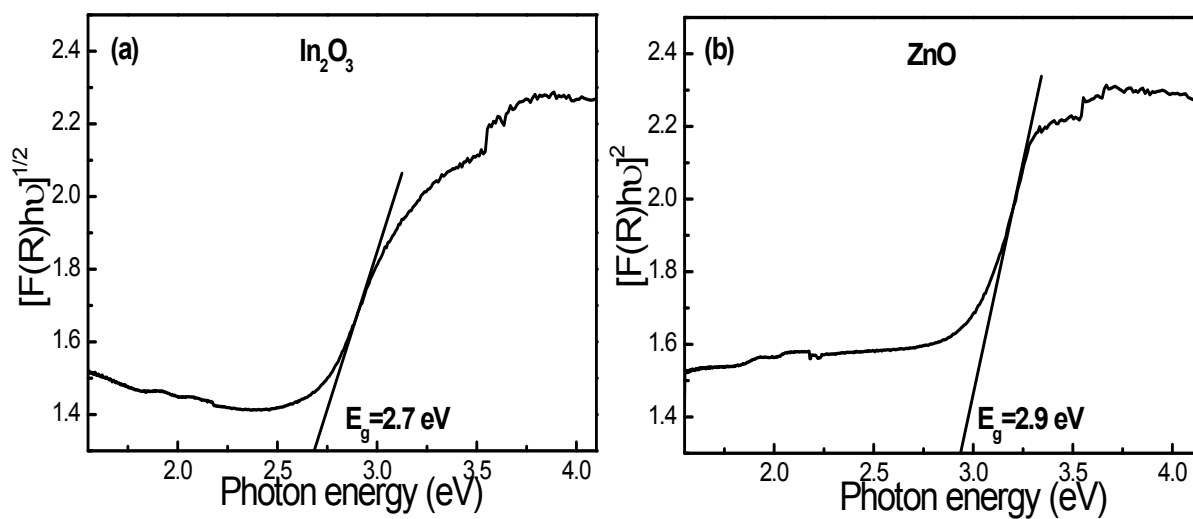

**Fig. SI5** The plots of  $F(R)hv$  against the photo energy about (a)  $\text{In}_2\text{O}_3$  and (b)  $\text{ZnO}$  with different nanostructures, respectively.

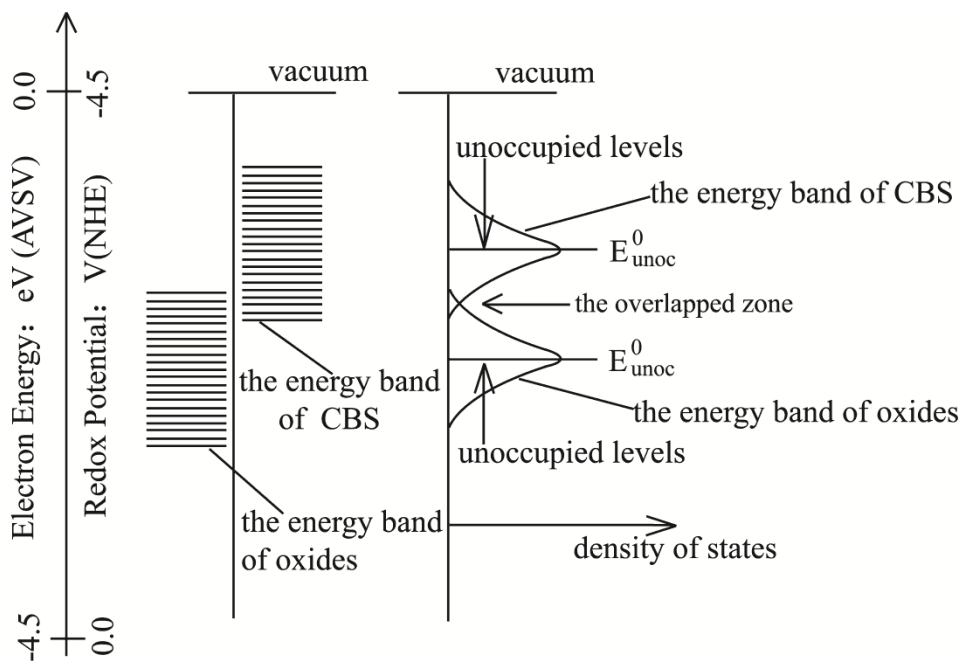

**Fig. SI6** The transport mechanism of photogenerated charges under zero and positive bias in four sensitized electrodes ( $E_c$ : the bottom of conduction band;  $E_v$ : the top of valence band;  $E_f$ : the Fermi energy level;  $\Delta E_c$ : the difference of conduction band edges at the interface;  $\Delta E_v$ : the difference of valence band edges at the interface;  $NHE$ : the normal hydrogen electrode;  $AVS$ : the absolute vacuum energy scale;  $h\nu$ : the energy of photon).
